# Supplementary material
Source: publisher figshare collection journal article supplement (https://wiley.figshare.com/articles/dataset/_/3559605)
Supplement: Supplementary file 2 [file 1 › appendix-B.htm]

Ecological Archives E095-154-A2


*Ecological Archives* E095-154-A2

Nathanael I. Lichti, Michael A. Steele, Hao Zhang, Robert K. Swihart. 2014. Mast species composition alters seed fate in North American rodent-dispersed hardwoods. *Ecology* 95:1746–1758. http://dx.doi.org/10.1890/13-1657.1

Appendix B. Modeling seed dispersal with imperfect detection.

> View / download PDF.


---

[Back to E095-154]
